# Supplementary material for: Point Mutations and Cytochrome P450 Can Contribute to Resistance to ACCase-Inhibiting Herbicides in Three Phalaris Species
Source: MDPI journal article supplement (doi:10.3390/plants10081703), 2021-08-19
Supplement: s1 [file s1]

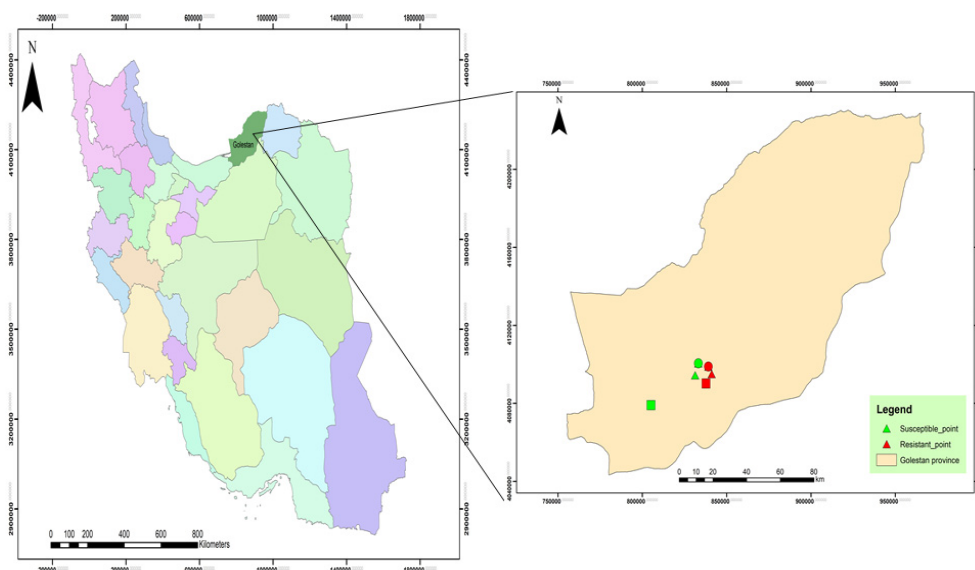

**Figure S1.** Geographical position of Golestan Province in Iran and distribution map of *Phalaris* genus, Circles represent *P. minor*, squares represent *P. brachystachys*, triangles represent *P. paradoxa*

**Table S1.** Geographical location, collection site of *Phalaris* genus biotypes

| Species                 | Statues | Geographical location |                |         | Collection site |
|-------------------------|---------|-----------------------|----------------|---------|-----------------|
|                         |         | Province              | UTM coordinate |         |                 |
| <i>P. minor</i>         | R       | Golestan              | 304994         | 4094381 | Wheat field     |
|                         | S       | Golestan              | 299195         | 4096390 | Wheat field     |
| <i>P. paradoxa</i>      | R       | Golestan              | 306742         | 4090452 | Wheat field     |
|                         | S       | Golestan              | 296930         | 4090432 | Wheat field     |
| <i>P. brachystachys</i> | R       | Golestan              | 303097         | 4085868 | Wheat field     |
|                         | S       | Golestan              | 269860         | 4076834 | Wheat field     |
